# Supplementary material for: Cardiomyocyte Aldose Reductase Causes Heart Failure and Impairs Recovery from Ischemia
Source: PubMed Central journal article supplement (PMC3459912; doi:10.1371/journal.pone.0046549), 2012-09-27

## Supplementary Figure S4

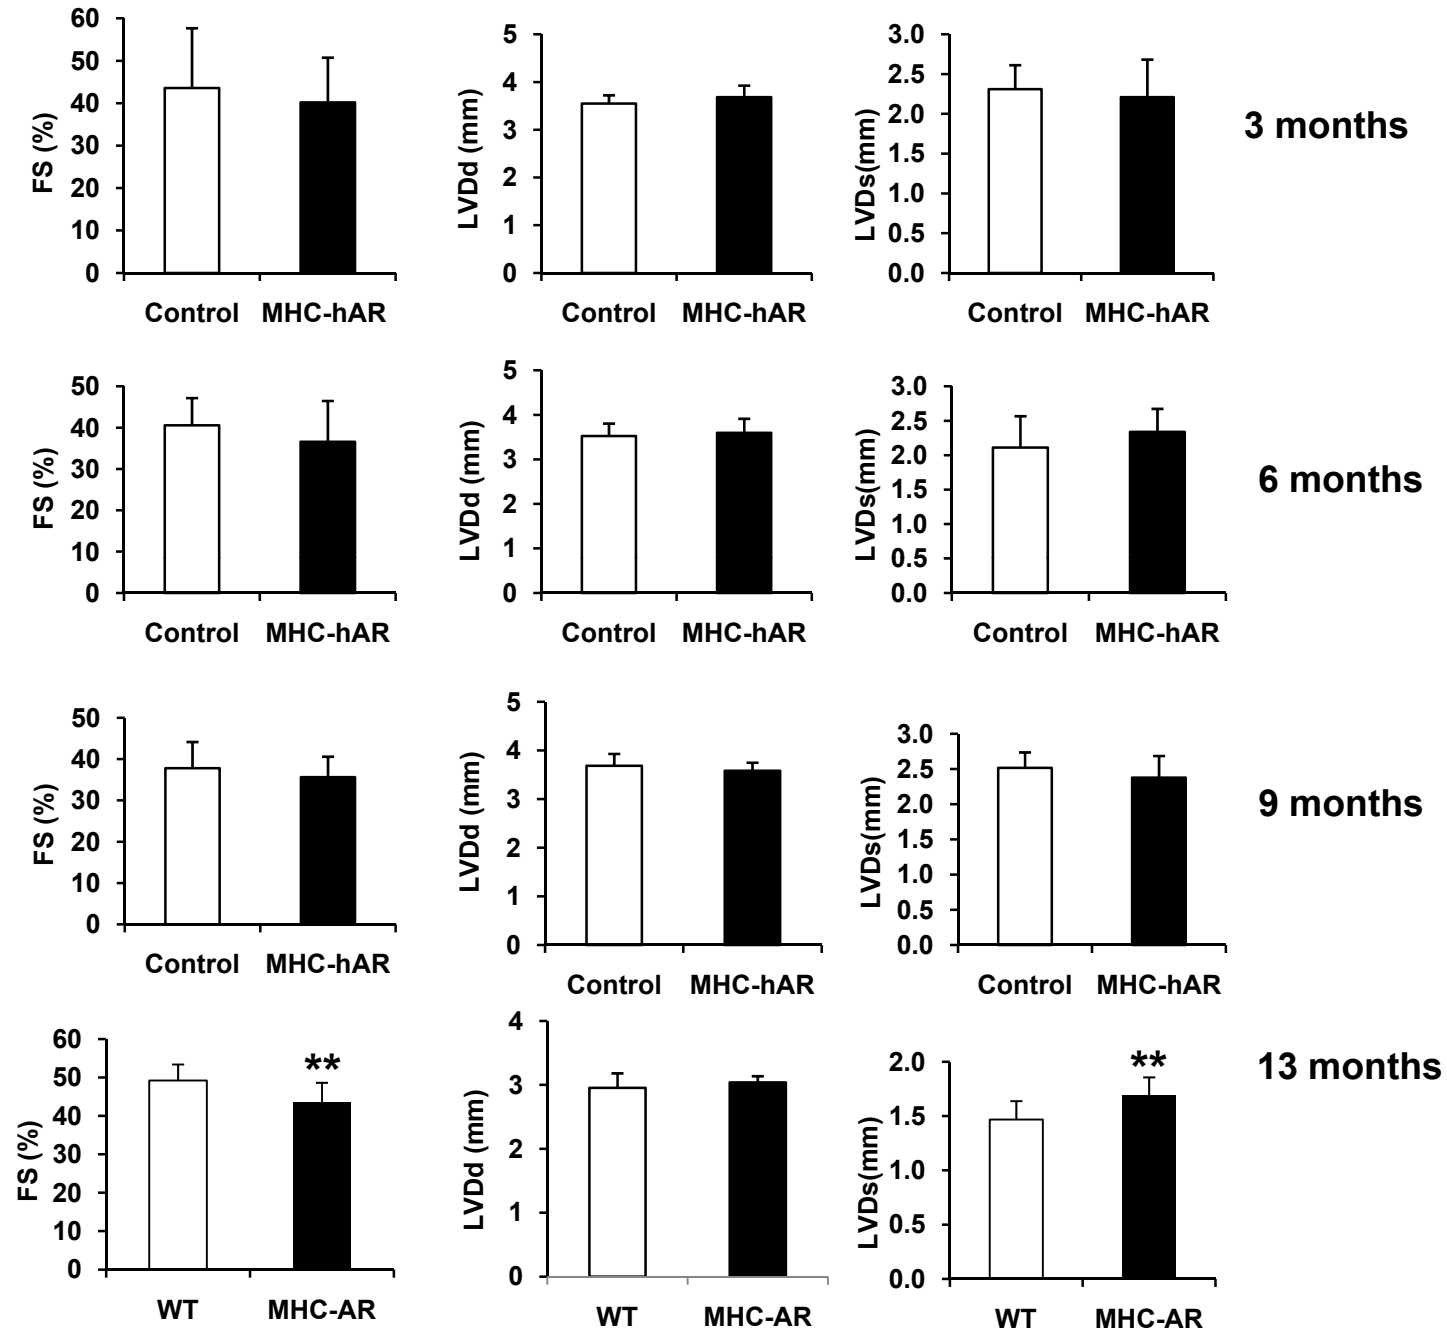

Supplement: pone.0046549.s004.pdf [file pone.0046549.s004.pdf]
