# Supplementary material for: Cardiomyocyte Aldose Reductase Causes Heart Failure and Impairs Recovery from Ischemia
Source: PubMed Central journal article supplement (PMC3459912; doi:10.1371/journal.pone.0046549), 2012-09-27
Supplement: pone.0046549.s005.pdf [file pone.0046549.s005.pdf]

**Supplementary Table S1**

|                        | <b>3-month</b>           |                           | <b>13-month</b>           |                           |
|------------------------|--------------------------|---------------------------|---------------------------|---------------------------|
|                        | <b>Control<br/>(n=8)</b> | <b>MHC-hAR<br/>(n=11)</b> | <b>Control<br/>(n=14)</b> | <b>MHC-hAR<br/>(n=14)</b> |
| <b>FFA (mole/L)</b>    | <b>0.96 ± 0.12</b>       | <b>0.94 ± 0.10</b>        | <b>0.40 ± 0.06</b>        | <b>0.42 ± 0.09</b>        |
| <b>TG (mg/dl)</b>      | <b>68.6 ± 8.70</b>       | <b>74.4 ± 10.8</b>        | <b>140.0 ± 50.4</b>       | <b>132.2 ± 31.2</b>       |
| <b>TC (mg/dl)</b>      | <b>84.5 ± 6.4</b>        | <b>82.9 ± 9.0</b>         | <b>126.6 ± 18.7</b>       | <b>129.6 ± 11.6</b>       |
| <b>Glucose (mg/dl)</b> | <b>135.6 ± 9.6</b>       | <b>137.0 ± 9.1</b>        | <b>155.7 ± 31.1</b>       | <b>149.7 ± 18.9</b>       |

Male mice with 6h fasting. Data are shown as mean (± S.D.).
