# Supplementary material for: Cardiomyocyte Aldose Reductase Causes Heart Failure and Impairs Recovery from Ischemia
Source: PubMed Central journal article supplement (PMC3459912; doi:10.1371/journal.pone.0046549), 2012-09-27
Supplement: pone.0046549.s006.pdf [file pone.0046549.s006.pdf]

## Supplementary Table S2

|                 | Control<br>(n=6) | MHC-hAR<br>(n=7) | PPAR $\alpha^{-/-}$<br>(n=8) | MHC-hAR/PPAR $\alpha^{-/-}$<br>(n=8) |
|-----------------|------------------|------------------|------------------------------|--------------------------------------|
| FFA (mole/L)    | 1.07 $\pm$ 0.09  | 1.12 $\pm$ 0.11  | 1.40 $\pm$ 0.25*             | 1.29 $\pm$ 0.48                      |
| TG (mg/dl)      | 64.9 $\pm$ 8.70  | 63.8 $\pm$ 17.8  | 60.4 $\pm$ 9.6               | 60.7 $\pm$ 15.4                      |
| TC (mg/dl)      | 87.7 $\pm$ 16.2  | 99.7 $\pm$ 5.8   | 105.5 $\pm$ 10.6             | 107.2 $\pm$ 18.5                     |
| Glucose (mg/dl) | 140.8 $\pm$ 32.7 | 116.8 $\pm$ 17.9 | 123.0 $\pm$ 15.5             | 113.3 $\pm$ 20.6                     |

Male mice with 6h fasting. Data are shown as mean ( $\pm$  S.D.). \*P < 0.05 vs. control mice.
